# Supplementary material for: A resettable supramolecular platform for constructing scalable encoders
Source: Royal Society of Chemistry journal article supplement (doi:10.1039/c9cc00577c), 2019-01-01
Supplement: c9cc00577c1.pdf [file c9cc00577c1.pdf]

Electronic Supplementary Information

**A resettable supramolecular platform for  
constructing Scalable Encoders**

Chunrong Yang,<sup>a</sup> Shu Yang,<sup>b</sup> Lingbo Song,<sup>b</sup> Ye Yao,<sup>a</sup> Xiao Lin,<sup>a</sup> Kaicong Cai,<sup>c</sup> Qianfan Yang<sup>a\*</sup> and  
Yalin Tang<sup>d</sup>

*a. College of Chemistry, Sichuan University, Chengdu, 610065, China*

*b. West China School of Pharmacy, Sichuan University, Chengdu 610064, P. R. China*

*c. Fujian Provincial Key Laboratory of Featured Materials in Biochemical Industry, Ningde Normal University,  
Ningde, 352100, China.*

*d. Institute of Chemistry, Chinese Academy of Sciences, Beijing, 100190, China.*

*The corresponding author: [yangqf@scu.edu.cn](mailto:yangqf@scu.edu.cn)*

## S(a) - Experimental details

### Chemicals and materials

DNA oligonucleotides (listed in Tab. S1) were purchased from Sangon Biotechnology Co. Ltd. (Shanghai, China). The cyanine dye *MTC* was synthesized in our lab and the purity was proved by high resolution mass spectrometry (HRMS), high performance liquid chromatography (HPLC), nuclear magnetic resonance ( $^1\text{H}$  NMR,  $^{13}\text{C}$  NMR) and absorption spectroscopy. All the analytical reagent grade chemicals were purchased from Aldrich Ltd. (Shanghai, China) and used as received without further purification. Ultrapure water prepared by ULUPURE (Chengdu, China) ultrapure water system and was used throughout the experiments.

**Tab. S1** The DNA oligonucleotides used in this work.

|                      |                                      |              |
|----------------------|--------------------------------------|--------------|
| <b>C<sub>0</sub></b> | <b>CCCACCCTCCCACCC</b>               | <b>15 nt</b> |
| <b>C<sub>1</sub></b> | <b>CCACCACCACCACAACCACCACCACCAAA</b> | <b>29 nt</b> |
| <b>C<sub>2</sub></b> | <b>CCAACCACACCAACC</b>               | <b>15 nt</b> |
| <b>C<sub>3</sub></b> | <b>CCACCACCACCA</b>                  | <b>12 nt</b> |
| <b>C<sub>4</sub></b> | <b>CCCTAACCCCTAACCCCTAACCCCTAA</b>   | <b>24 nt</b> |
| <b>C<sub>5</sub></b> | <b>AACCCACCC</b>                     | <b>9 nt</b>  |
| <b>C<sub>6</sub></b> | <b>TTTTCCACACCTTTT</b>               | <b>15 nt</b> |
| <b>G<sub>0</sub></b> | <b>GGAGGAGGAGGA</b>                  | <b>12 nt</b> |
| <b>G<sub>1</sub></b> | <b>TGAGGGTGGGGAGGGTGGGGAA</b>        | <b>22 nt</b> |
| <b>G<sub>2</sub></b> | <b>GTGGGTAGGGCGGGTTGGTGTGGTTGG</b>   | <b>27 nt</b> |
| <b>G<sub>3</sub></b> | <b>GGTGGTGGTGGTGTGGTGGTGGTGGTTT</b>  | <b>29 nt</b> |
| <b>G<sub>4</sub></b> | <b>TTAGGGTTAGGGTTAGGGTTAGGG</b>      | <b>24 nt</b> |
| <b>G<sub>5</sub></b> | <b>GGGTGGGTGGGTGGG</b>               | <b>15 nt</b> |
| <b>G<sub>6</sub></b> | <b>GGTGGTGGTGGT</b>                  | <b>12 nt</b> |

## **Instruments and equipment**

The absorption spectra were acquired using a 10 mm quartz cuvette on an EVOLUTION 201 spectrophotometer (Thermo SCIENTIFIC, USA) at 37 °C in a 10 mm quartz cell, and the scan range is 400-750 nm. The melting curves of *MTC* aggregates were collected by heating the samples to 80 °C at a rate of 0.01 °C / s.

The fluorescence spectra were collected with a F-4600 spectrophotometer (HITACHI, Japan) in a 10 mm quartz cell, Xenon arc lamp was used as the excitation light source. Both the excitation and emission slits were 5 nm, the PMT voltage was 400 V. The excitation wavelength was 530 nm and emission wavelength were 530 -750 nm. The fluorescence intensity variation curve was collected by heating the samples to 75 °C at a rate of 0.01 °C / s.

The circular dichroism spectra were collected with a Chirascan Plus spectrophotometer (AppliedPhotophysics, UK) in a 10 mm quartz cell. The bandwidth is 1 nm. High purity N<sub>2</sub> was used as a shielding gas before and during the collection and all data were collected at room temperature.

## **Sample preparation**

The DNase I was dissolved in 10 mM, pH 6.5 Tris-Ac buffer solution to 5 mg/mL. The 200 μM *MTC* stock solution was prepared by dissolving 7.67 mg *MTC* powder in 50 mL methanol and stored in darkness. The concentration of *MTC* stock solution is corrected by diluting 50 μL stock solution to 1000 μL with methanol, measuring its absorbance at 573 nm and calculating the actual concentration via Lambert-beer's law. The DNA stock solutions were prepared by dissolving certain amounts of oligonucleotides in 10 mM, pH 6.5 Tris-Ac buffer solution. The concentrations of DNA were determined by measuring absorbance at 260 nm. All these metal salts were dissolved by ultrapure water. The stock solution of AgNO<sub>3</sub>, MgCl<sub>2</sub>, Cu(NO<sub>3</sub>)<sub>2</sub>, Pb(NO<sub>3</sub>)<sub>2</sub>, MnCl<sub>2</sub>, CoSO<sub>4</sub>, ZnSO<sub>4</sub>, NiSO<sub>4</sub>, Ca(NO<sub>3</sub>)<sub>2</sub> was 10 mM and the stock solution of MnCl<sub>2</sub> is 50 mM.

## Operations of the EC circuits

To demonstrate the logic functions of the platform better, the input conditions were optimized in each circuit. All the stimuli, metal ions and DNA strands, were incubated with *MTC* in dark at 37 °C for 30 min before the measurement.

In the 4-to-2 and 7-to-3 ECs, 30  $\mu\text{L}$  *MTC* stock solution (200  $\mu\text{M}$ ) and metal ions were added into 10 mM, pH 6.5 Tris-Ac buffer solution. The total volume of the reaction sample is 1000  $\mu\text{L}$ . The final concentration of the ions is 0.4 mM  $\text{Ag}^+$ , 0.4 mM  $\text{Mg}^{2+}$ , 0.4 mM  $\text{Pb}^{2+}$ , 2 mM  $\text{Mn}^{2+}$ , 0.08 mM  $\text{Co}^{2+}$ , 0.2 mM  $\text{Zn}^{2+}$  and 0.4 mM  $\text{Ca}^{2+}$ . When all the stock solution added in, the samples were stand at room temperature for 5 min to fully mixed and then incubated at 37 °C in dark for 30 min.

In the 8-to-3 and 14-to-4 ECs, 30  $\mu\text{L}$  *MTC* stock solution (200  $\mu\text{M}$ ), DNA and metal ions were added into 10 mM, pH 6.5 Tris-Ac buffer solution. The total volume of the reaction sample is 1000  $\mu\text{L}$ . The final concentration of the ions is same as that in 7-to-3 EC. The final concentration of the DNA strands is 0.5  $\mu\text{M}$   $\text{C}_0$ , 0.5  $\mu\text{M}$   $\text{C}_1$ , 0.5  $\mu\text{M}$   $\text{C}_2$ , 0.5  $\mu\text{M}$   $\text{C}_3$ , 0.5  $\mu\text{M}$   $\text{C}_4$ , 0.5  $\mu\text{M}$   $\text{C}_5$ , 0.5  $\mu\text{M}$   $\text{C}_6$ , 1.5  $\mu\text{M}$   $\text{G}_0$ , 0.3  $\mu\text{M}$   $\text{G}_1$ , 0.5  $\mu\text{M}$   $\text{G}_2$ , 0.3  $\mu\text{M}$   $\text{G}_3$ , 5  $\mu\text{M}$   $\text{G}_4$ , 0.7  $\mu\text{M}$   $\text{G}_5$  and 0.5  $\mu\text{M}$   $\text{G}_6$ . When all the stock solution added in, the samples were stand at room temperature for 5 min to fully mixed and then incubated at 37 °C in dark for 30 min.

## Resetting of the EC circuits

For the resetting of the 4-to-2 and 7-to-3 ECs, EDTA was added the samples that have been implemented encoder's operation. The concentration of EDTA in each sample was in line with the corresponding metal ion, i.e., 0.08 or 0.4 or 3 mM. After incubated at 40 °C in dark for 20 min, absorption spectra were collected.

For the resetting of the 8-to-3 and 14-to-4 ECs, we added EDTA and DNase I separately. To avoid the heavy metal ions disturbing the hydrolysis process, EDTA was added into the system to complex the ions in advance. After incubated at 37 °C for 10 min, 5  $\mu\text{L}$  DNase I (5mg/mL) was added, and the samples were further incubated at 25°C for 30 min. Finally, the samples were heated at 70 °C for 10 min to

inactivate the enzyme. Since the metal ions were chelated by EDTA in advance, subsequent enzymatic cleavage reactions would not be affected by the ions.

## S(b) - Synthesis and identification of *MTC*

### 1. Synthesis of *MTC*

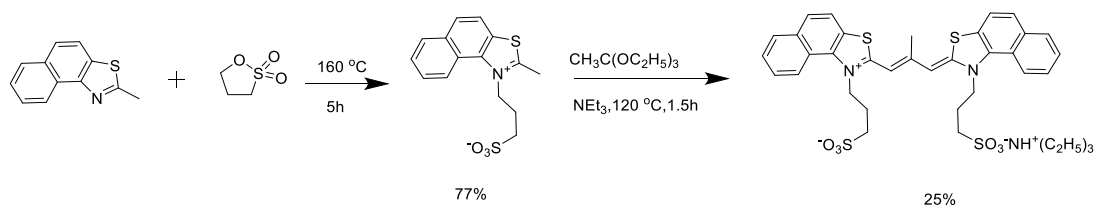

The cyanine dye *MTC* was synthesized according to the methods of Hamer<sup>1</sup> and Ficken<sup>2</sup>. In the first step, 0.51 g (2.56 mmol) 2-methylnaphthyl-thiazole and 1.05 g (8.59 mmol) 1,3-propyl sulfonate were mixed and reaction at 160 °C for 5 h. The reaction was traced with TLC. The mixture was then recrystallized in diethyl ether. After evaporated to dryness in vacuum 0.63 mg (77% yield) solid was obtained. Then 0.52 g solid (1.617 mmol), 0.53 g (3.267 mmol) triethyl orthoacetate, 1.05 g phenol (11.16 mmol) and 0.5 mL triethylamine were mixed and then heated at 120 °C for 1.5 h. When the reaction completed, ether was used to deal with the product and then methanol was used to recrystallization. After evaporated to dryness in vacuum 0.30 mg (25% yield) solid was obtained.

## 2. HRMS-ESI

\*HRMS(ESI)  $m/z$   $[M-H]^- = 665.09069$

The calculated exact mass of  $C_{32}H_{29}N_2O_6S_4^-$  is 665.09139.

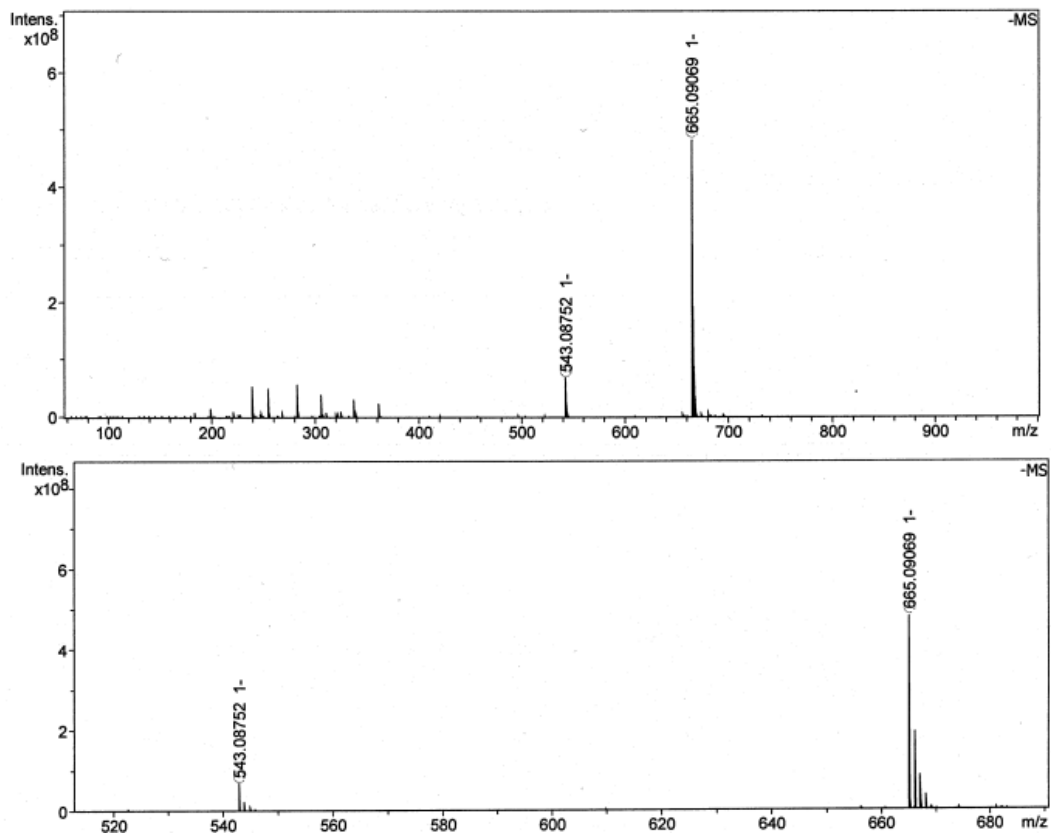

Fig. S1 The HRMS(ESI) spectrum of cyanine dye *MTC*.

### 3. $^1\text{H-NMR}$ spectrum

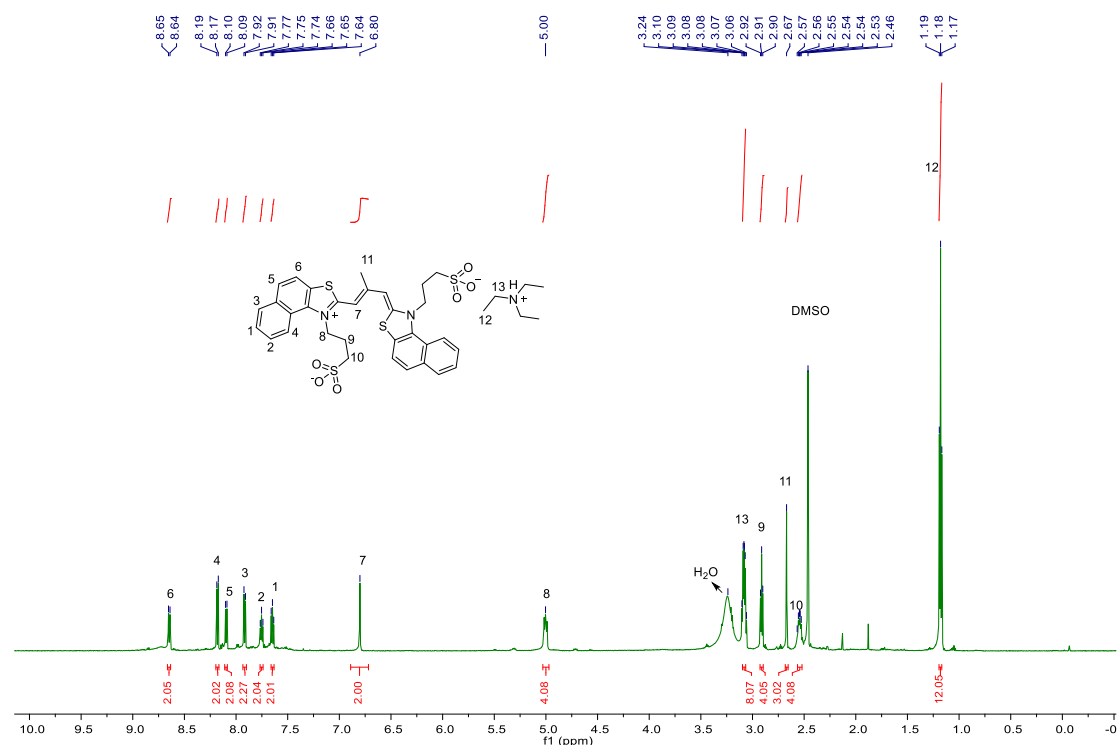

Fig. S2 The  $^1\text{H-NMR}$  spectrum of cyanine dye *MTC* in  $\text{DMSO-}d_6$ .

$^1\text{H NMR}$  (600 MHz,  $\text{DMSO-}d_6$ )  $\delta$  8.65 (d,  $J = 8.7$  Hz, 2H), 8.18 (d,  $J = 8.6$  Hz, 2H), 8.09 (d,  $J = 8.2$  Hz, 2H), 7.92 (d,  $J = 8.6$  Hz, 2H), 7.75 (t,  $J = 7.7$  Hz, 2H), 7.66 - 7.63 (m, 2H), 6.80 (s, 2H), 5.06 - 4.97 (m, 4H), 3.10 - 3.05 (m, 8H), 2.91 (t,  $J = 6.6$  Hz, 4H), 2.67 (s, 3H), 2.56 - 2.52 (m, 4H), 1.19 (d,  $J = 7.2$  Hz, 12H).

According to the  $^1\text{H-NMR}$  spectrum, the signals are in line with *MTC*'s structure but the integrations at 1.18 and 3.10 ppm show there are excessive triethylamine in the sample.

The signals at 1.18 and 3.10 ppm are assigned to the ethyl groups on the triethylammonium ion and the integration ratio (12:8) is in accordance with the triethylamine structure (3:2). Theoretically, the integrations at should be 9H (1.18 ppm) and 6H (3.10 ppm), respectively. However, in the synthesis process, the excessive triethylamine is difficult to eliminate completely. The excess signals may come from the residual triethylamine in the synthesis. Since small amount of triethylamine would not influence the feature of *MTC*, the sample was used without further purification.



#### 4. $^{13}\text{C}$ -NMR spectrum

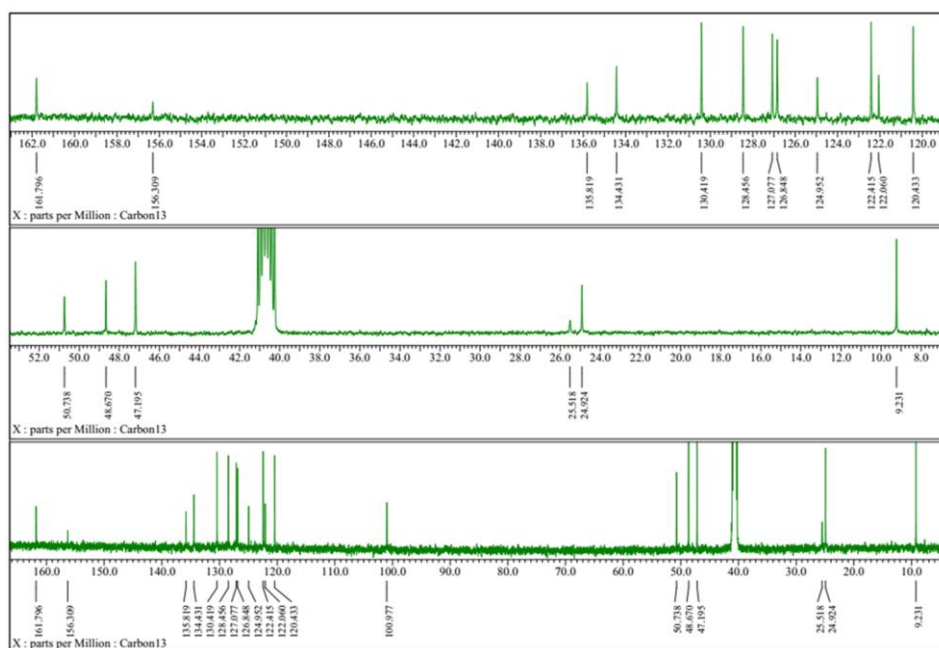

Fig. S3 The  $^{13}\text{C}$ -NMR spectrum of cyanine dye *MTC* in  $\text{DMSO-d}_6$ .

$^{13}\text{C}$  NMR (151 MHz,  $\text{DMSO-D}_6$ )  $\delta$  161.80, 156.31, 135.82, 134.43, 130.42, 128.46, 127.08, 126.85, 124.95, 122.41, 122.06, 120.43, 100.98, 50.74, 48.67, 47.20, 25.52, 24.92, 9.23

#### 5. HSQC and HMBC spectra

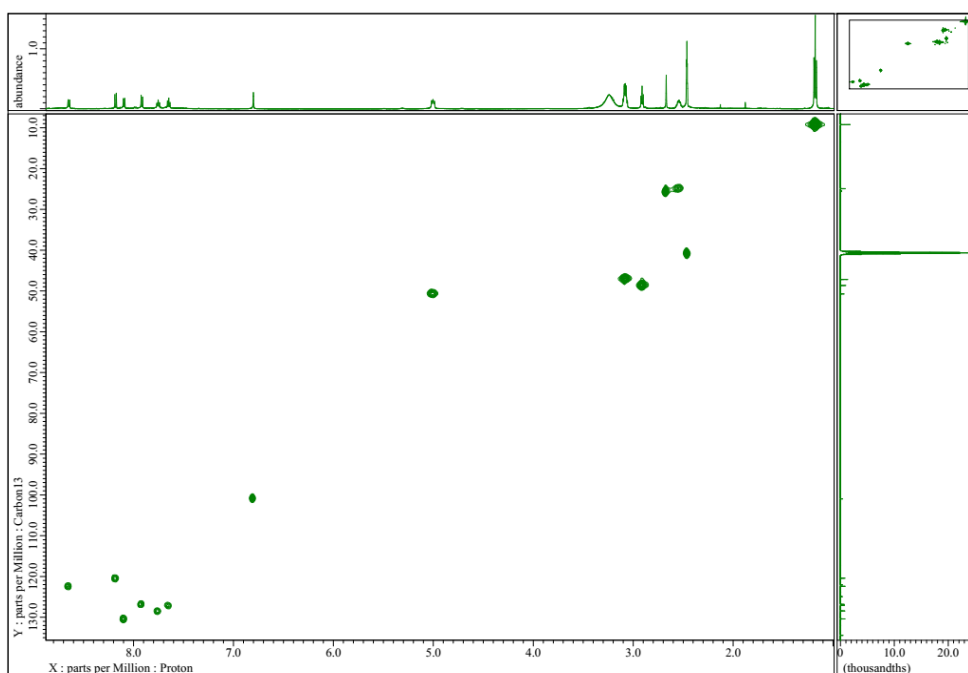

Fig. S4 The HSQC spectrum of cyanine dye *MTC* in  $\text{DMSO-d}_6$ .

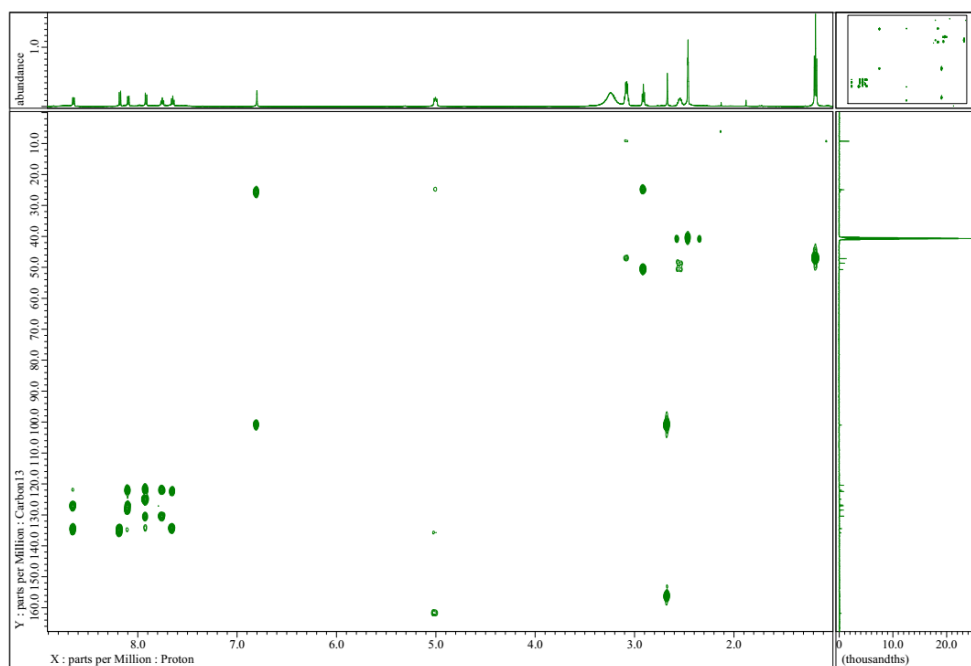

**Fig. S5** The HMBC spectrum of cyanine dye *MTC* in DMSO-d<sub>6</sub>.

## 5. HPLC

**A**

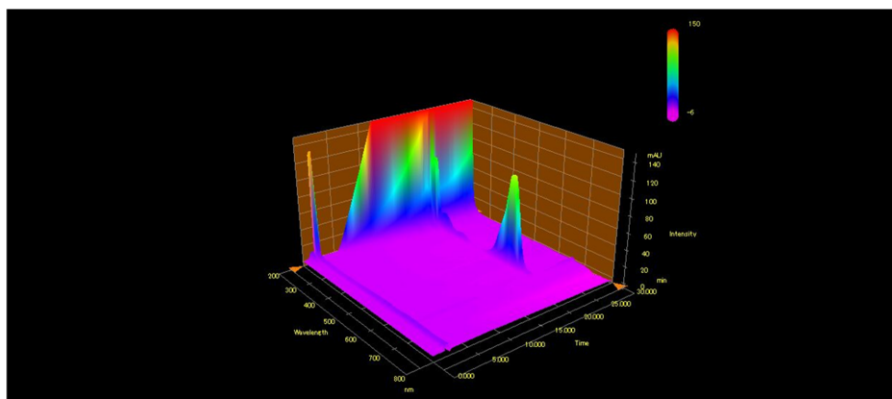

**B**

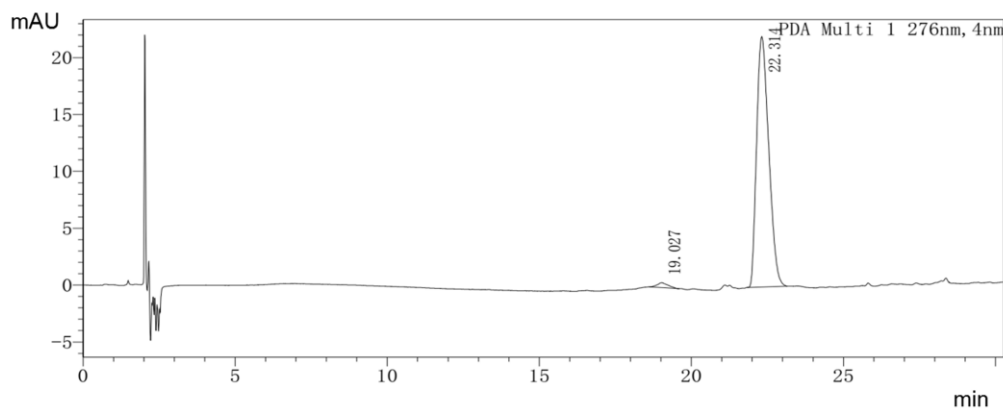

| Peak No. | Retention Time | Area   | Area%  | Height |
|----------|----------------|--------|--------|--------|
| 1        | 19.027         | 10730  | 1.728  | 435    |
| 2        | 22.314         | 610315 | 98.272 | 22017  |

**C**

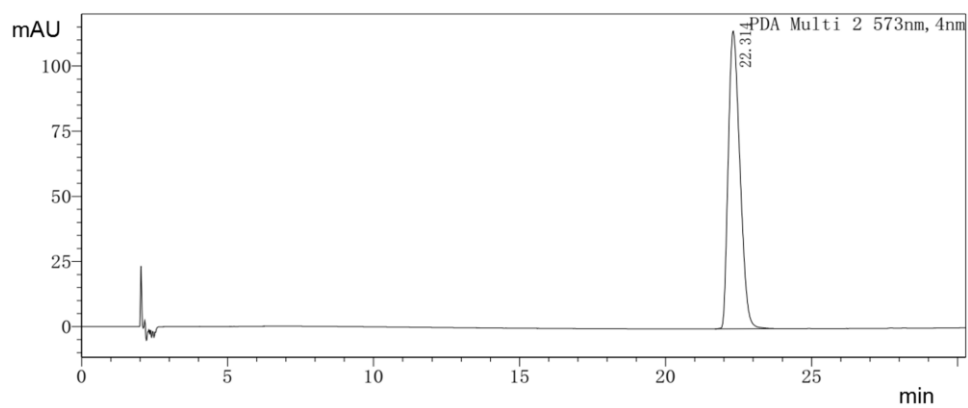

| Peak No. | Retention Time | Area    | Area% | Height |
|----------|----------------|---------|-------|--------|
| 1        | 22.314         | 3174113 | 100   | 114222 |

**Fig. S6** The HPLC trace of cyanine dye *MTC* in CH<sub>3</sub>OH-H<sub>2</sub>O solution (5-100% CH<sub>3</sub>OH). Inertsil C<sub>18</sub> Column, flow rate 1.0 mL/min, T = 30 °C. (A)DAD:200-800 nm. (B)  $\lambda$  = 276 nm. (C)  $\lambda$  = 573 nm.

## 6. UV/Vis spectrum research and absorption coefficient calculation

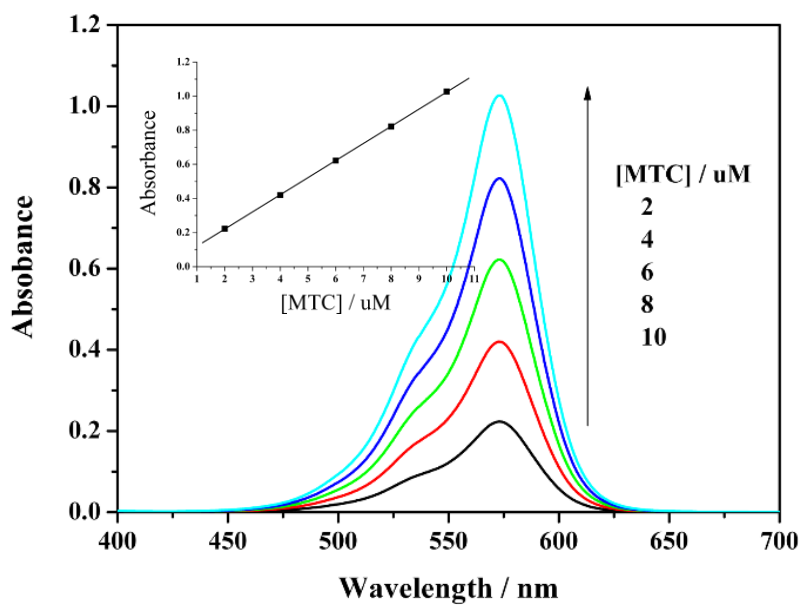

**Fig. S7** The absorption spectra of *MTC* monomer in methanol. Insert gives the curve of the absorbance at 573 nm against the concentration of *MTC* monomer.

Based on Lambert-beer's law, the molar absorption coefficient of *MTC* monomer is

$$\varepsilon_{1cm,573nm}^M = 1.00 \times 10^6 M^{-1} \cdot cm^{-1}.$$

## S(c) - The study on *MTC* assembly behavior

### 1. The regulation via metal ions

According to the regulation, we optimized the concentration of each ions to 0.4 mM  $\text{Ag}^+$ , 0.4 mM  $\text{Mg}^{2+}$ , 0.4 mM  $\text{Cu}^{2+}$ , 0.4 mM  $\text{Pb}^{2+}$ , 2 mM  $\text{Mn}^{2+}$ , 0.08 mM  $\text{Co}^{2+}$ , 0.2 mM  $\text{Zn}^{2+}$ , 0.2 mM  $\text{Ni}^{2+}$  and 0.4 mM  $\text{Ca}^{2+}$  in encoder construction. And we further plotted the normalized absorbance of each assembly states as bar charts in Fig. S9.

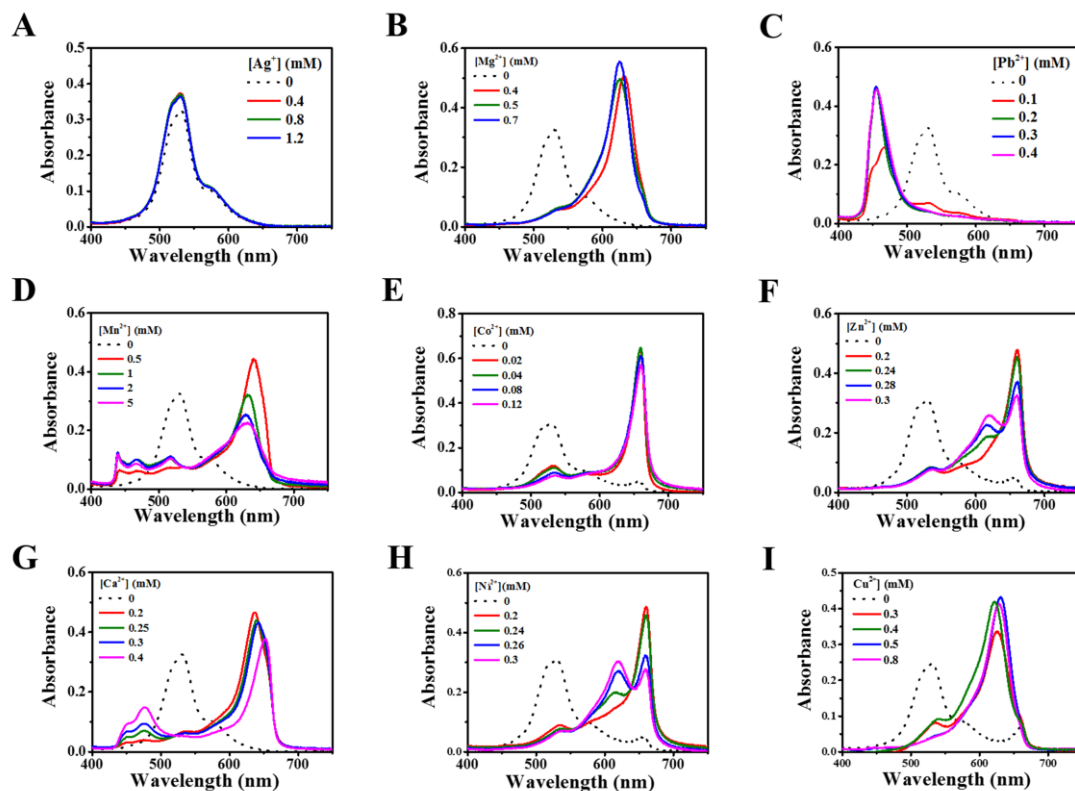

Fig. S8 The regulation of metal ions on 6  $\mu\text{M}$  *MTC* in 10 mM, pH 6.5 tris-Ac buffer solution.

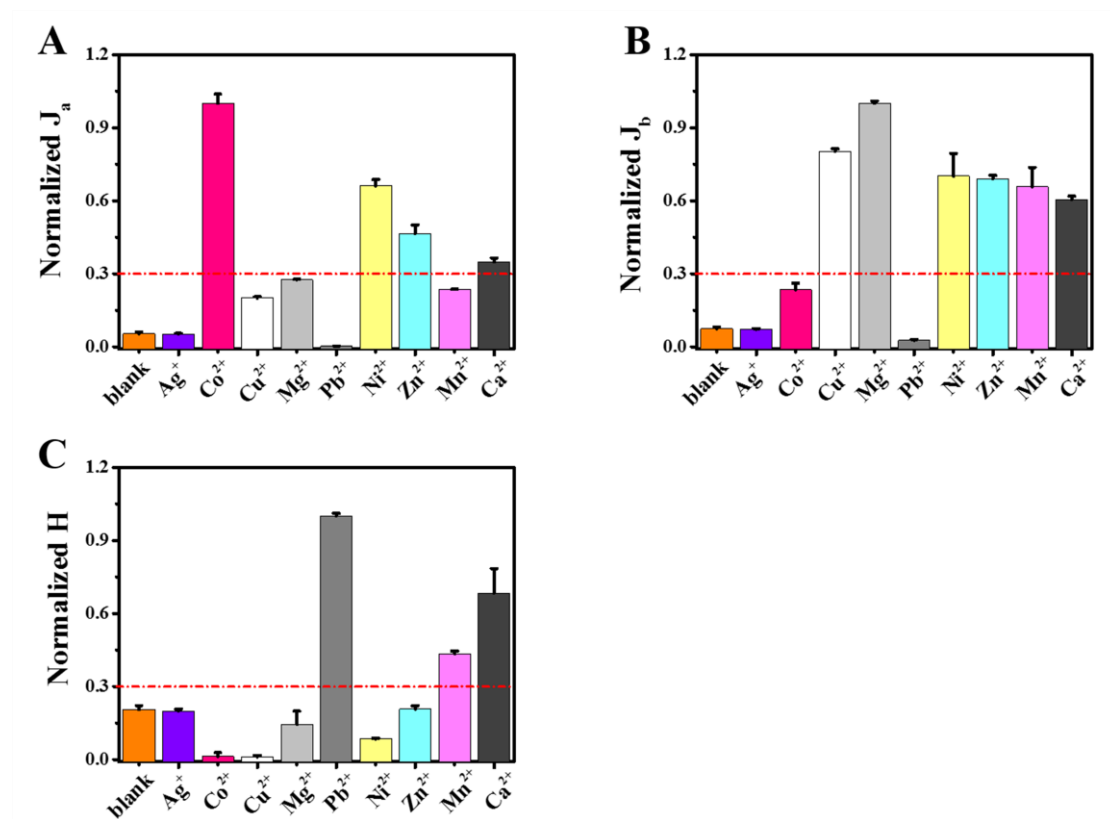

**Fig. S9** The normalized 6  $\mu$ M *MTC*  $J_a$ ,  $J_b$  and  $H$  signals induced by nine ions, i.e., 0.4 mM  $Ag^+$ , 0.08 mM  $Co^{2+}$ , 0.4 mM  $Cu^{2+}$ , 0.4 mM  $Mg^{2+}$ , 0.4 mM  $Pb^{2+}$ , 0.2 mM  $Ni^{2+}$ , 0.2 mM  $Zn^{2+}$ , 2 mM  $Mn^{2+}$  and 0.4 mM  $Ca^{2+}$  10 mM, pH 6.5 tris-Ac buffer solution. The normalized absorbance value higher 0.3 defined as “1”, otherwise as “0”.

## 2. The reverse regulation via EDTA

For the resetting process, we used EDTA to chelate various metal ions. The conditional stability constants ( $\lg K'$ ) of the seven ions at pH 7.0 are: 3.9 ( $\text{Ag}^+$ ), 5.3 ( $\text{Mg}^{2+}$ ), 14.5 ( $\text{Pb}^{2+}$ ), 10.6 ( $\text{Mn}^{2+}$ ), 12.9 ( $\text{Co}^{2+}$ ), 13.1 ( $\text{Zn}^{2+}$ ), 7.3 ( $\text{Ca}^{2+}$ ), indicating that all of these ions can be well eliminated by EDTA.

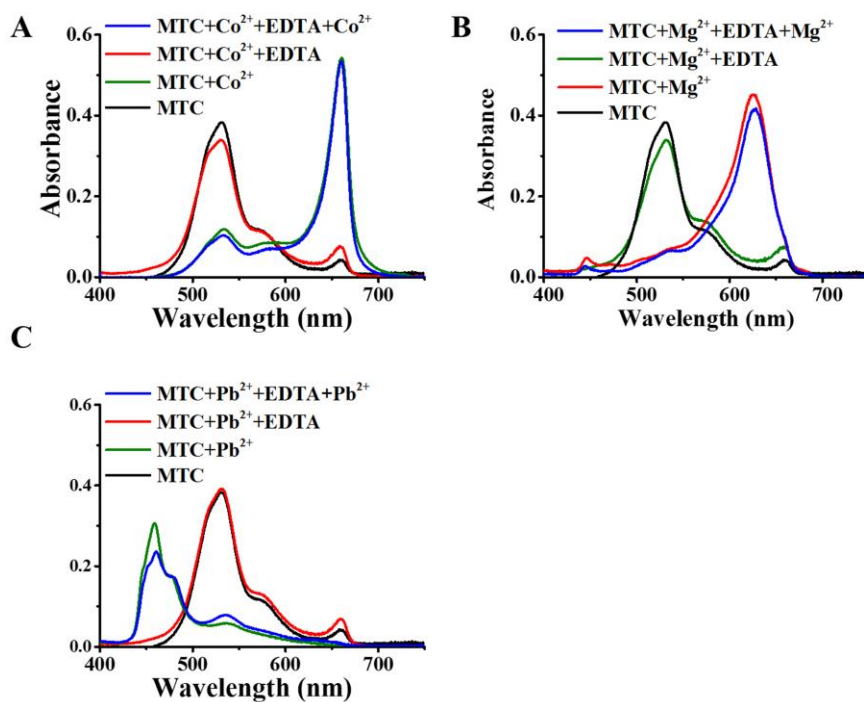

**Fig. S10** The inputting-resetting performance of 6  $\mu\text{M}$  *MTC* in 10 mM, pH 6.5 tris-Ac buffer solution. (A) 0.08 mM  $\text{Co}^{2+}$  and 0.08 mM EDTA. (B) 0.4 mM  $\text{Mg}^{2+}$  and 0.4 mM EDTA. (C) 0.4 mM  $\text{Pb}^{2+}$  and 0.4 mM EDTA.

### 3. The interaction with DNA

The influence of metal ions on the DNA structures have been studied by circular dichroism (CD) spectroscopy. As shown in Fig. S11, under the effects of different metal ions, the seven guanine-rich (G-rich) DNA strands ( $G_0$ - $G_6$ ) can fold into several secondary structures: 1) random coil single strands (termed SS-G) that have no obvious characteristic CD signal; 2) parallel G-quadruplex with a positive signal around 262 nm and a negative signal around 240 nm<sup>3</sup>; 3) antiparallel G-quadruplex induced by  $Pb^{2+}$  with a positive signal around 315 nm<sup>4</sup>; 4)  $Ag^+$  induced feature positive signal around 285 nm and 230 nm<sup>5</sup>. The results were summarized in Tab. S2 and the highlighted parts are the combination mode of DNA and metal ion used in this work.

In our design strategy, the DNA strands were introduced as parts of inputs to produce additional output signal (M-FI). We therefore studied the fluorescence intensity changes as a function of DNA concentration in different metal ion/DNA combination modes. As shown in Fig. S10, the fluorescence intensity of *MTC* induced by G-rich DNA strands are 5-160 folds of that induced by C-rich strands (take  $C_1$  as the example) inferring the stronger interaction between *MTC* and the G-rich strands. Due to the complicated secondary structures (ss-G, parallel and antiparallel G-quadruplex) and various binding ratios, it is hard to calculate the accurate association constants of *MTC* and the DNA strands. Instead, we use the linear fit slopes to roughly evaluate the binding abilities of the DNA strands to *MTC*. As shown in Fig. S10, the slopes of G-DNA strands are at least 10 times than that of  $C_1$ , indicating that although the G-rich DNA strands can present various secondary structures, the logic function can be implemented properly.

It is reported that parallel G-quadruplex presents much stronger interaction with *MTC*<sup>6</sup>. Therefore, we calculated the binding constant of  $G_1$  G-quadruplex induced by  $Mg^{2+}$  and *MTC*. As shown in Fig. S13, according to the tangent fitting result, a 1:1 binding model for *MTC* with  $G_1$  was confirmed by the Job's plot analysis<sup>7</sup> and the binding constant was  $1.083 \times 10^5 \text{ M}^{-1}$  in the presence of 0.4 mM  $Mg^{2+}$ .



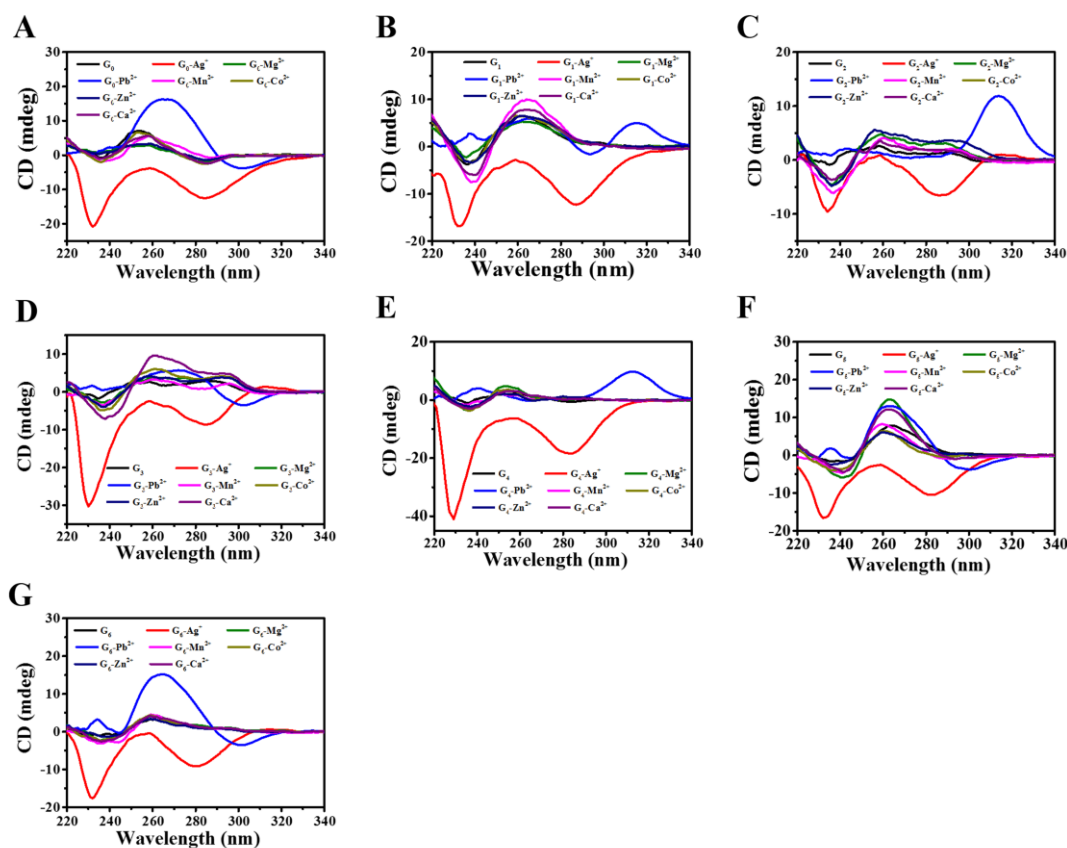

**Fig. S11** Circular dichroism spectra of  $G_0$ - $G_6$  under different metal ions conditions: none metal ions, 0.4 mM  $Ag^+$ , 0.4 mM  $Mg^{2+}$ , 0.4 mM  $Pb^{2+}$ , 2 mM  $Mn^{2+}$ , 0.08 mM  $Co^{2+}$ , 0.2 mM  $Zn^{2+}$ , 0.4 mM  $Ca^{2+}$ . The concentration of DNA is 5  $\mu$ M.

**Tab. S2** The influence of metal ions on the DNA strands  $G_0$ - $G_6$ .

|                 | $G_0$                 | $G_1$                     | $G_2$                     | $G_3$  | $G_4$                     | $G_5$                 | $G_6$                 |
|-----------------|-----------------------|---------------------------|---------------------------|--------|---------------------------|-----------------------|-----------------------|
| none metal ions | SS-G                  | parallel G-quadruplex     | SS-G                      | SS-G   | SS-G                      | parallel G-quadruplex | SS-G                  |
| $Ag^+$          | Ag-DNA                | Ag-DNA                    | Ag-DNA                    | Ag-DNA | Ag-DNA                    | Ag-DNA                | Ag-DNA                |
| $Mg^{2+}$       | SS-G                  | parallel G-quadruplex     | SS-G                      | SS-G   | SS-G                      | parallel G-quadruplex | SS-G                  |
| $Pb^{2+}$       | parallel G-quadruplex | antiparallel G-quadruplex | antiparallel G-quadruplex | SS-G   | antiparallel G-quadruplex | parallel G-quadruplex | parallel G-quadruplex |
| $Mn^{2+}$       | SS-G                  | parallel G-quadruplex     | SS-G                      | SS-G   | SS-G                      | parallel G-quadruplex | SS-G                  |
| $Co^{2+}$       | SS-G                  | parallel G-quadruplex     | SS-G                      | SS-G   | SS-G                      | parallel G-quadruplex | SS-G                  |
| $Zn^{2+}$       | SS-G                  | parallel G-quadruplex     | SS-G                      | SS-G   | SS-G                      | parallel G-quadruplex | SS-G                  |
| $Ca^{2+}$       | SS-G                  | parallel G-quadruplex     | SS-G                      | SS-G   | SS-G                      | parallel G-quadruplex | parallel G-quadruplex |

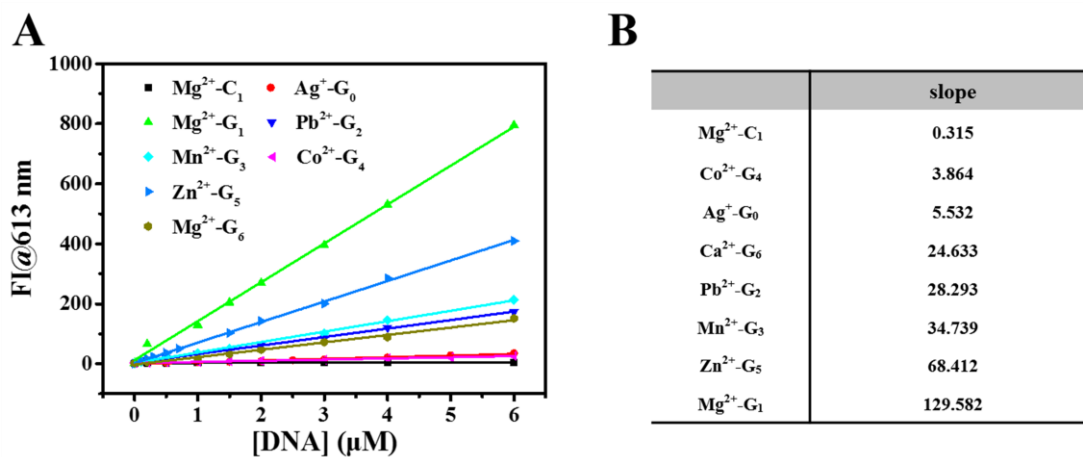

**Fig. S12** (A) The titration curves of 6  $\mu\text{M}$  *MTC* monomer fluorescence intensity against the concentration of DNA. (B) The linear fit slopes of each DNA strands.

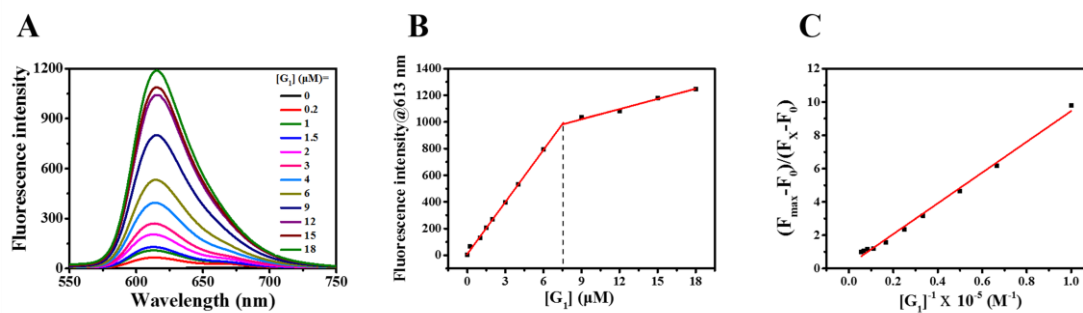

**Fig. S13** The fluorescence titration of  $G_1$  in 10 mM, pH 6.5 tris-Ac buffer solution with 0.4 mM  $\text{Mg}^{2+}$  and 6  $\mu\text{M}$  *MTC*. (A) The fluorescence spectra, (B) the linear fitting curve and (C) the  $(F_{\text{max}} - F_x) / (F_x - F_0)$  as a function of  $[G_1]^{-1} \times 10^5 \text{ M}^{-1}$ .

#### 4. Kinetic study on *MTC* assembly/disassembly

As shown in Fig. S14A-C, the assembly process of H-, J<sub>b</sub>- and J<sub>a</sub>-aggregates, regulated by Pb<sup>2+</sup>, Mg<sup>2+</sup> and Co<sup>2+</sup> respectively, can reach balance within 30 min and *MTC* can produce dramatic fluorescence signal with DNA in 2 min. Fig. S14D-F show that the simultaneous assembly of several aggregates regulated by Mn<sup>2+</sup>, Zn<sup>2+</sup> and Ca<sup>2+</sup> are dynamic, and *MTC* prefers to firstly assemble to unstable J-aggregates and then converses to more stable H-aggregates with time. Considering the logical feature of encoder, we optimized the operation time of the ECs to 30 min.

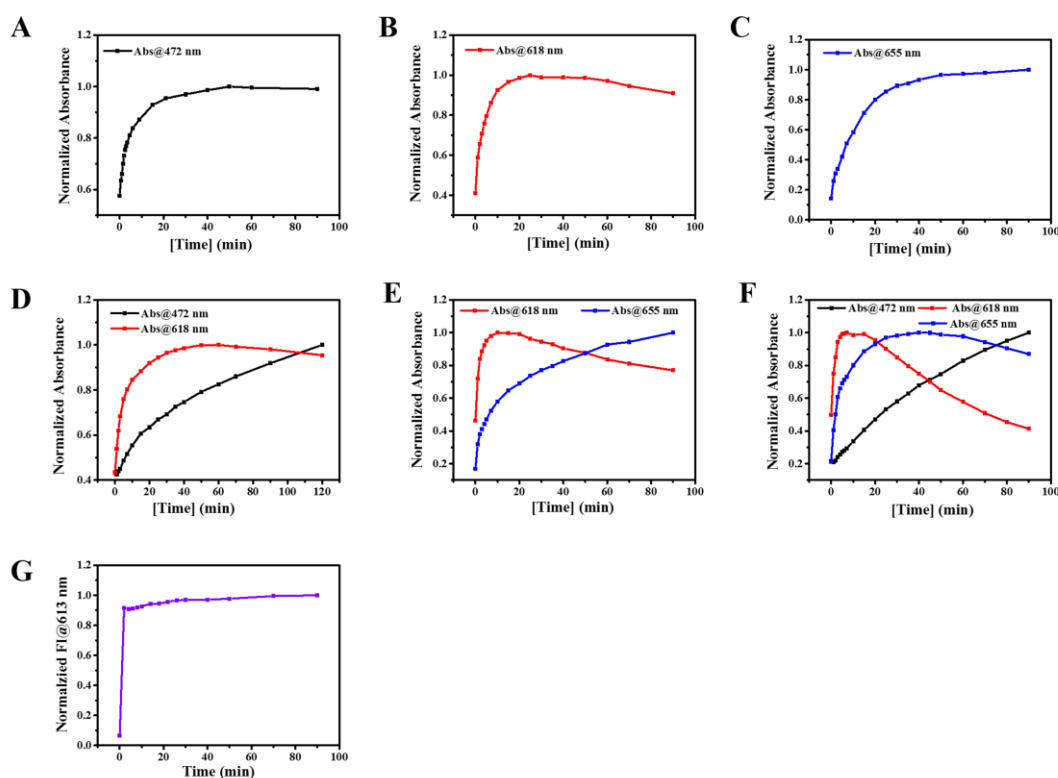

**Fig. S14** Kinetics of the *MTC* aggregation and DNA binding processes. Time traces for the H-aggregates stabilized by 0.4 mM Pb<sup>2+</sup> (A), J<sub>b</sub>-aggregates stabilized by 0.4 mM Mg<sup>2+</sup> (B), J<sub>a</sub>-aggregates stabilized by 0.08 mM Co<sup>2+</sup>(C), mixture of H- and J<sub>b</sub>-aggregates stabilized by 2 mM Mn<sup>2+</sup>(D), mixture of J<sub>a</sub>- and J<sub>b</sub>-aggregates stabilized by 0.2 mM Zn<sup>2+</sup> (E), mixture of H-, J<sub>a</sub>- and J<sub>b</sub>-aggregates stabilized by 0.4 mM Ca<sup>2+</sup> (F), and fluorescence (FI@613 nm) induced by the mixture of 0.3 μM G<sub>1</sub> and 0.4 mM Mg<sup>2+</sup>(G). The concentration of *MTC* is 6 μM.

The kinetics of the resetting processes were also studied. As shown in Fig. S15, the H-, J<sub>b</sub>- and J<sub>a</sub>-aggregates induced by Pb<sup>2+</sup>, Mg<sup>2+</sup> and Co<sup>2+</sup> respectively can be

disassembled by EDTA within 10 min, and the enzymatic process can be finished within 30 min.

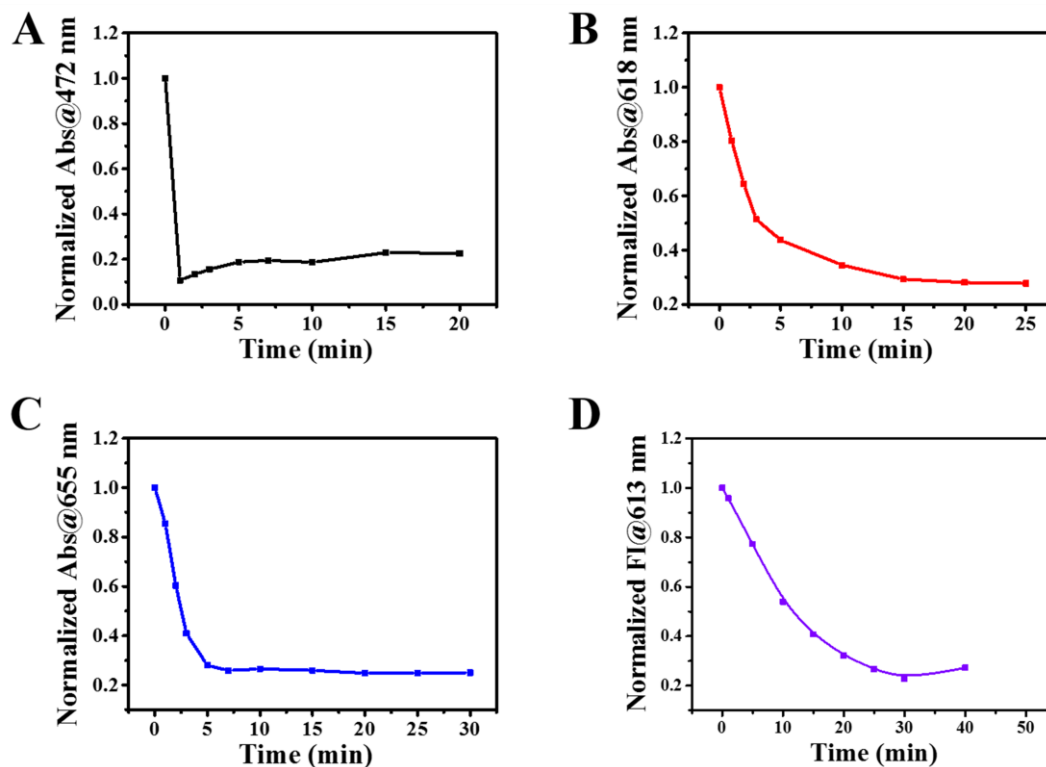

**Fig. S15** Kinetics of the resetting processes. (A) The H-aggregates is disassembled by 0.4 mM EDTA. (B) The  $J_b$ -aggregates is disassembled by 0.4 mM EDTA. (C) The  $J_a$ -aggregates is disassembled by 0.08 mM EDTA. (D) The  $G_1$  DNA hydrolyzed by 5  $\mu$ L DNase I (5 mg/mL). The H-aggregates is stabilized by 0.4 mM  $Pb^{2+}$ ,  $J_b$ -aggregates stabilized by 0.4 mM  $Mg^{2+}$ ,  $J_b$ -aggregates stabilized by 0.08 mM  $Co^{2+}$ . In digestion, 0.3  $\mu$ M  $G_1$  is mixed with 0.4 mM  $Mg^{2+}$ . The concentration of *MTC* in all situations is 6  $\mu$ M.

## 5. Thermodynamic study on *MTC* assembly/disassembly

As shown in Fig. S16, the thermodynamic stabilities of H-,  $J_a$ -,  $J_b$ -aggregates are as follow: H- aggregates >  $J_a$ - aggregates >  $J_b$ -aggregates, and all the aggregates can be disassembled with the increase of temperature. In addition, we also monitored the fluorescence intensity variation as a function of temperature. Fig. S16-G shows that the fluorescence intensity at 613 nm decreases significantly when temperature increased, and the intensity drops to half at 51.5 °C.

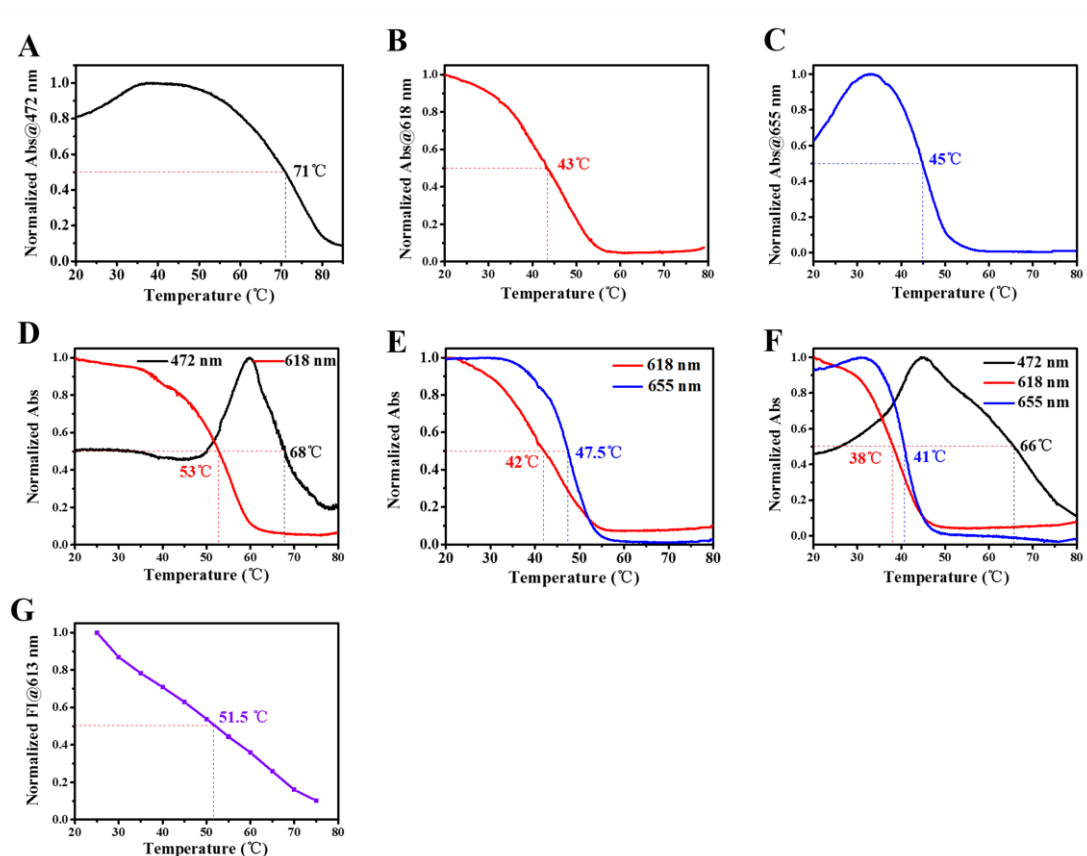

**Fig. S16** The melting curves of 6 μM *MTC* at different input conditions: (A) The H-aggregates stabilized by 0.4 mM  $Pb^{2+}$ . (B) The  $J_b$ -aggregates stabilized by 0.4 mM  $Mg^{2+}$ . (C) The  $J_a$ -aggregates stabilized by 0.08 mM  $Co^{2+}$ . (D) The H- and  $J_b$ -aggregates stabilized by 2 mM  $Mn^{2+}$ . (E) The  $J_a$ - and  $J_b$ -aggregates stabilized by 0.2 mM  $Zn^{2+}$ . (F) The H-,  $J_a$ - and  $J_b$ -aggregates stabilized by 0.4 mM  $Ca^{2+}$ . (H) The fluorescence induced by the mixture of 0.3 μM  $G_1$  and 0.4 mM  $Mg^{2+}$ . The heating rate is 0.01 °C/s.

## S(d) - The construction of the ECs

### 1. The original spectra of the 4-to-2 and 7-to-3 ECs

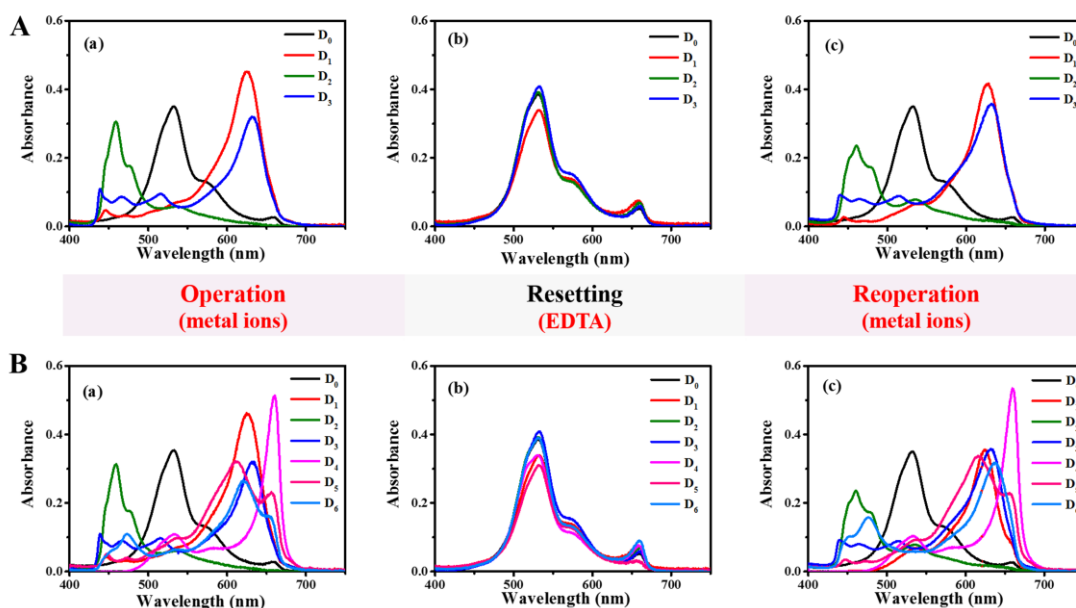

**Fig. S17** (A) The absorption spectra of 4-to-2 EC: operation (a), resetting (b) and reoperation (c). (B) The absorption spectra of 7-to-3 EC: operation (a), resetting (b) and reoperation (c). The concentration of *MTC* is 6  $\mu\text{M}$ .

## 2. The design of the 4-to-2 EC using $J_a$ and $J_b$ as outputs

Based on the *MTC* platform, another 4-to-2 EC was also performed, using  $J_a$  and  $J_b$  as outputs, and 0.4 mM  $Ag^+$ , 0.4 mM  $Cu^{2+}$ , 0.08 mM  $Co^{2+}$  and 0.2 mM  $Ni^{2+}$  as inputs. In the initial state, *MTC* is in the form of dimer in 10 mM, pH 6.5 tris-Ac buffer solution. The  $Ag^+$  in  $D_0$  channel has no influence on *MTC* dimer, therefore the readout ( $J_b$ ,  $J_a$ ) is (0, 0). In  $D_1$  channel,  $Cu^{2+}$  induces the formation of  $J_b$ -aggregates, resulting in (1, 0), while  $Co^{2+}$  induces the formation of  $J_a$ -aggregates, resulting in (0, 1) in  $D_2$  channel. In  $D_3$  channel, *MTC* is induced to a mixture of  $J_a$ - and  $J_b$ -aggregates by  $Ni^{2+}$ , resulting in (1, 1).

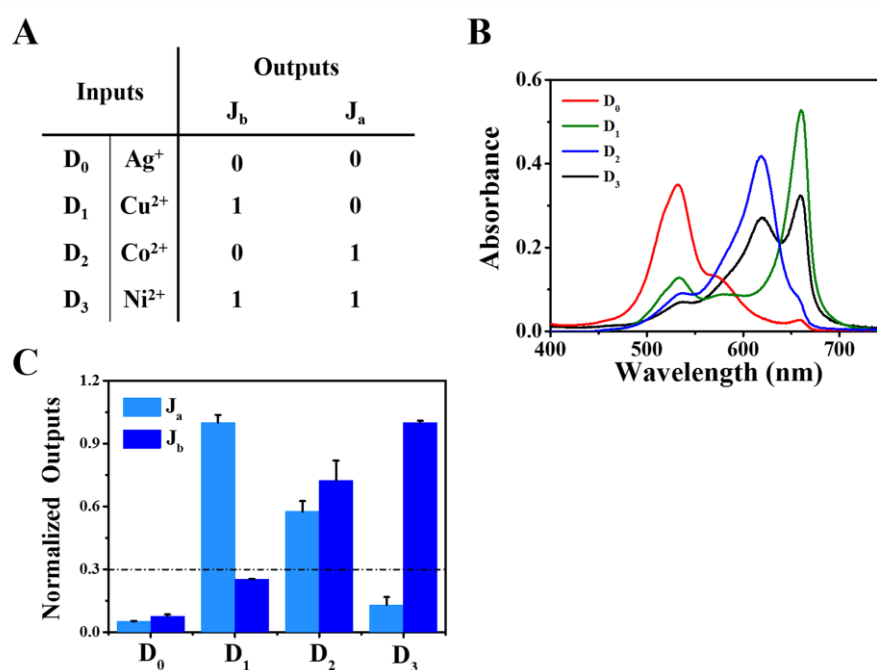

**Fig. S18** The design of the 4-to-2 EC using  $J_a$  and  $J_b$  as outputs. (A) The schematic truth table. (B) The absorption spectra. (C) The normalized outputs. The concentration of *MTC* is 6  $\mu$ M.

### 3. The spectra of the 8-to-3 EC

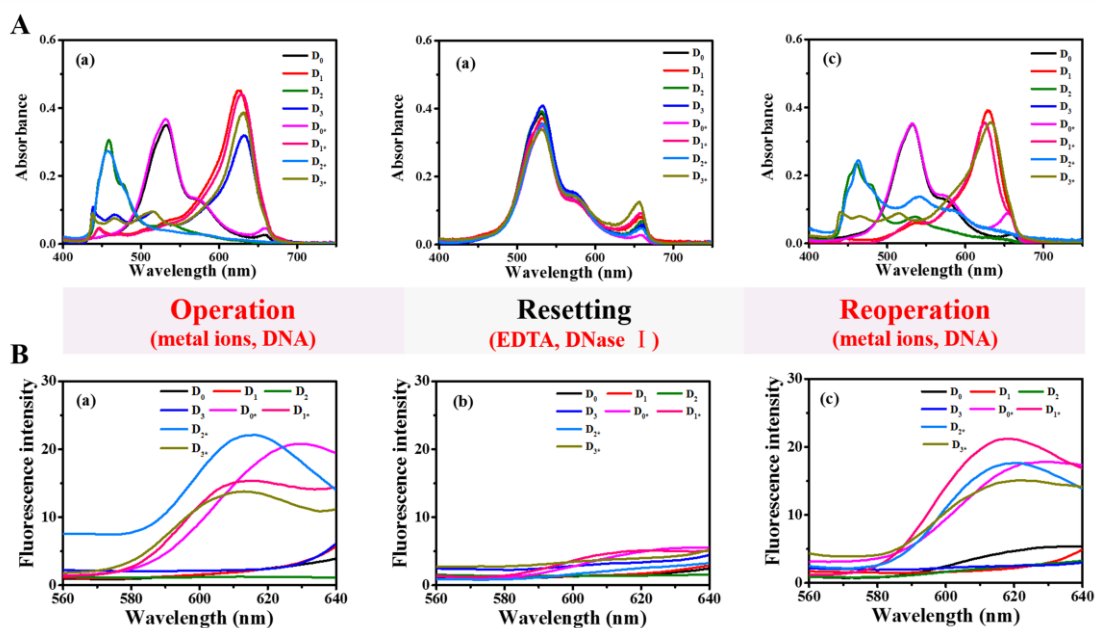

**Fig. S19** (A) The absorption spectra of the 8-to-3 EC: operation (a), resetting (b) and reoperation (c). (B) The fluorescence spectra of the 8-to-3 EC: operation (a), resetting (b) and reoperation (c). The concentration of *MTC* is 6  $\mu$ M.



#### 4. The spectra of the 14-to-4 EC

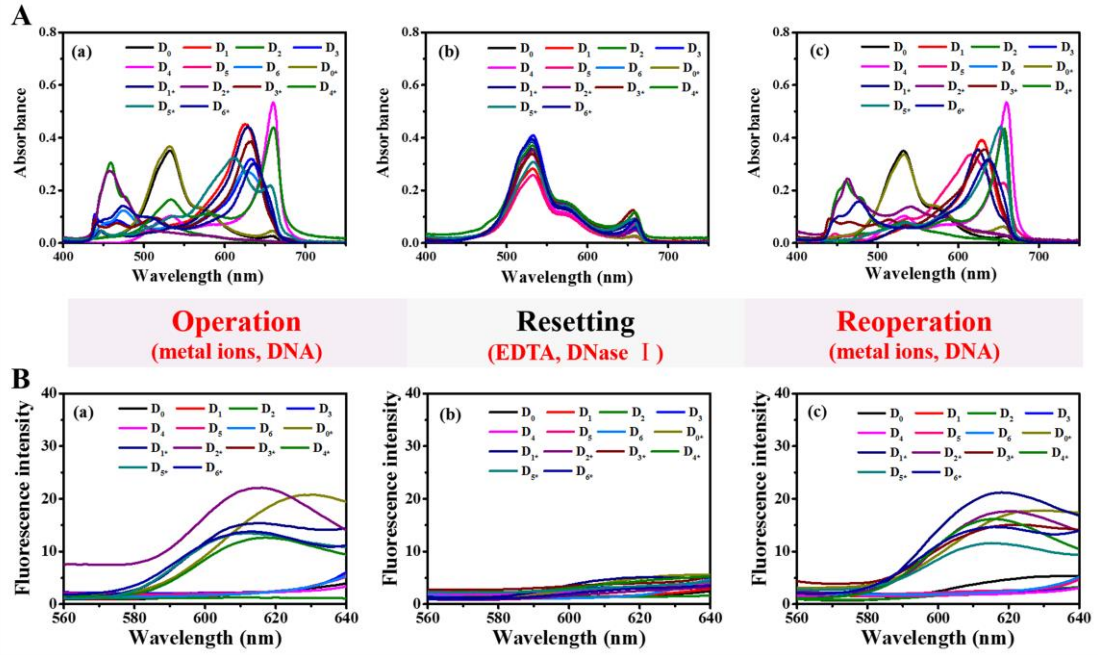

**Fig. S20** (A) The absorption spectra of 14-to-4 EC: operation (a), resetting (b) and reoperation (c). (B) The fluorescence spectra of 14-to-4 EC: operation (a), resetting (b) and reoperation (c). The concentration of *MTC* is 6  $\mu\text{M}$ .

## 5. The resetting and reoperation results in the 8-to-3 and 14-to-4 ECs

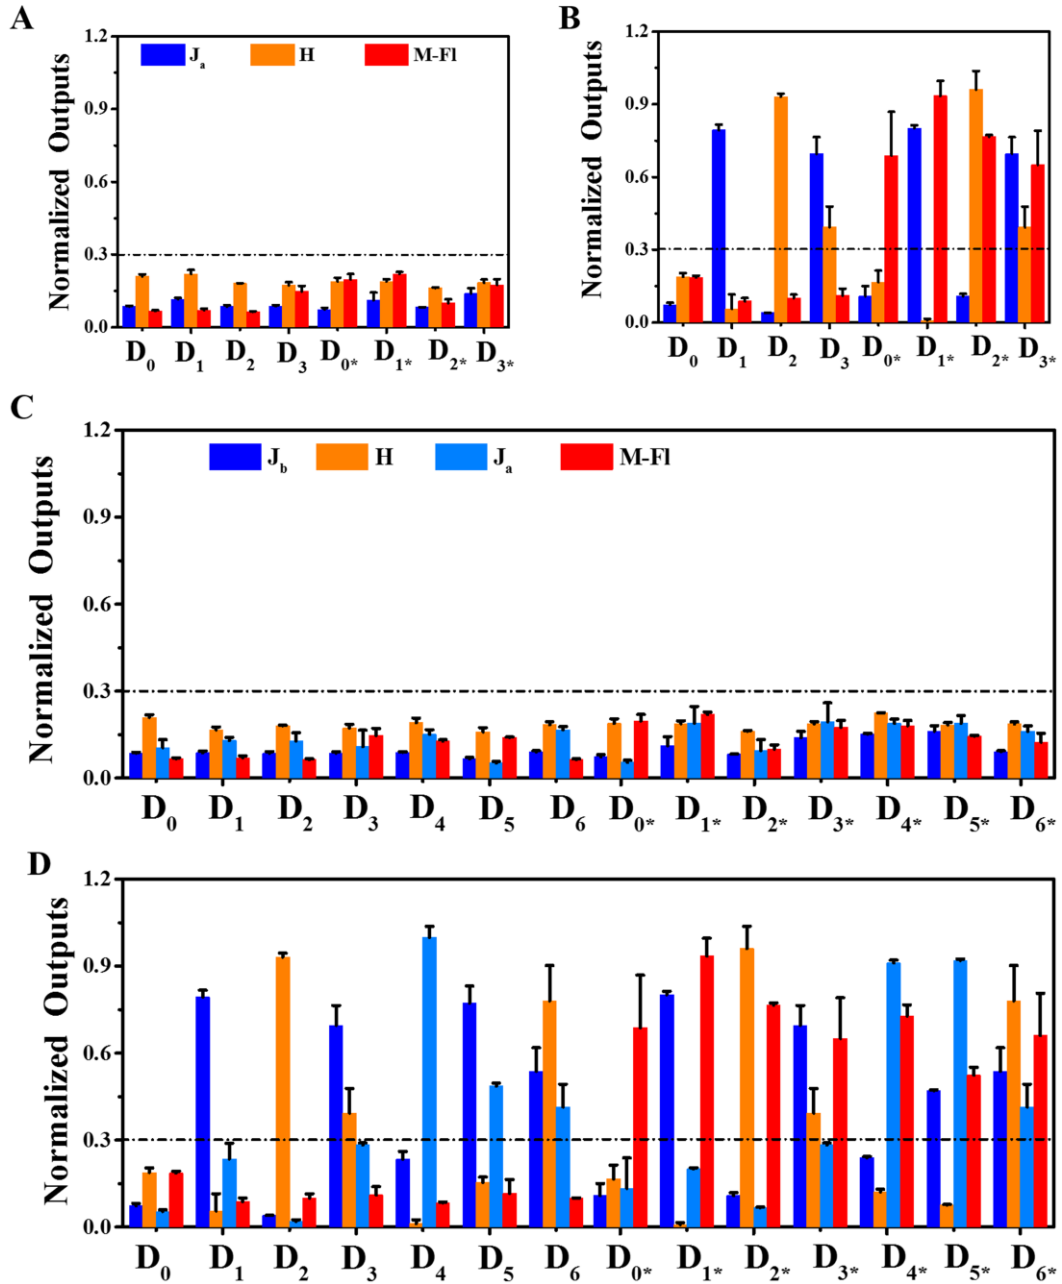

**Fig. S21** The resetting (A) and reoperation (B) results of the 8-to-3 EC. The resetting (C) and reoperation (D) results of the 14-to-4 EC. The concentration of *MTC* is 6  $\mu$ M.

### S(e) - The conversion between decimal and binary

**A**

|          |                        |          |                      | <b>H</b> | <b>J<sub>a</sub></b> | <b>J<sub>b</sub></b> | <b>M-FI</b> |
|----------|------------------------|----------|----------------------|----------|----------------------|----------------------|-------------|
| <b>0</b> | <b>Ag<sup>+</sup></b>  | <b>+</b> | <b>C<sub>0</sub></b> | <b>0</b> | <b>0</b>             | <b>0</b>             | <b>0</b>    |
| <b>1</b> | <b>Ag<sup>+</sup></b>  | <b>+</b> | <b>G<sub>0</sub></b> | <b>0</b> | <b>0</b>             | <b>0</b>             | <b>1</b>    |
| <b>2</b> | <b>Mg<sup>2+</sup></b> | <b>+</b> | <b>C<sub>1</sub></b> | <b>0</b> | <b>0</b>             | <b>1</b>             | <b>0</b>    |
| <b>3</b> | <b>Mg<sup>2+</sup></b> | <b>+</b> | <b>G<sub>1</sub></b> | <b>0</b> | <b>0</b>             | <b>1</b>             | <b>1</b>    |
| <b>4</b> | <b>Co<sup>2+</sup></b> | <b>+</b> | <b>C<sub>4</sub></b> | <b>0</b> | <b>1</b>             | <b>0</b>             | <b>0</b>    |
| <b>5</b> | <b>Co<sup>2+</sup></b> | <b>+</b> | <b>G<sub>4</sub></b> | <b>0</b> | <b>1</b>             | <b>0</b>             | <b>1</b>    |
| <b>6</b> | <b>Zn<sup>2+</sup></b> | <b>+</b> | <b>C<sub>5</sub></b> | <b>0</b> | <b>1</b>             | <b>1</b>             | <b>0</b>    |
| <b>7</b> | <b>Zn<sup>2+</sup></b> | <b>+</b> | <b>G<sub>5</sub></b> | <b>0</b> | <b>1</b>             | <b>1</b>             | <b>1</b>    |
| <b>8</b> | <b>Pb<sup>2+</sup></b> | <b>+</b> | <b>C<sub>2</sub></b> | <b>1</b> | <b>0</b>             | <b>0</b>             | <b>0</b>    |
| <b>9</b> | <b>Pb<sup>2+</sup></b> | <b>+</b> | <b>G<sub>2</sub></b> | <b>1</b> | <b>0</b>             | <b>0</b>             | <b>1</b>    |

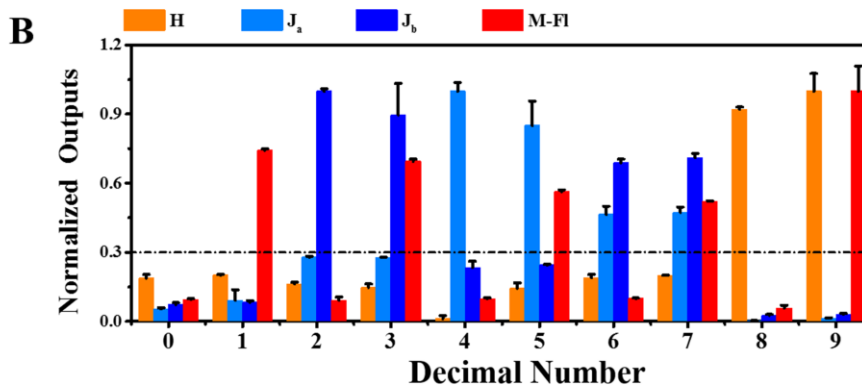

**Fig. S22** (A) The schematic truth table of the conversion between decimal and binary. (B) The normalized outputs of the conversion.

## S(f) - The temperature effect on the ECs

### 1. The temperature effect on the *MTC* aggregations and the *MTC*-DNA complex

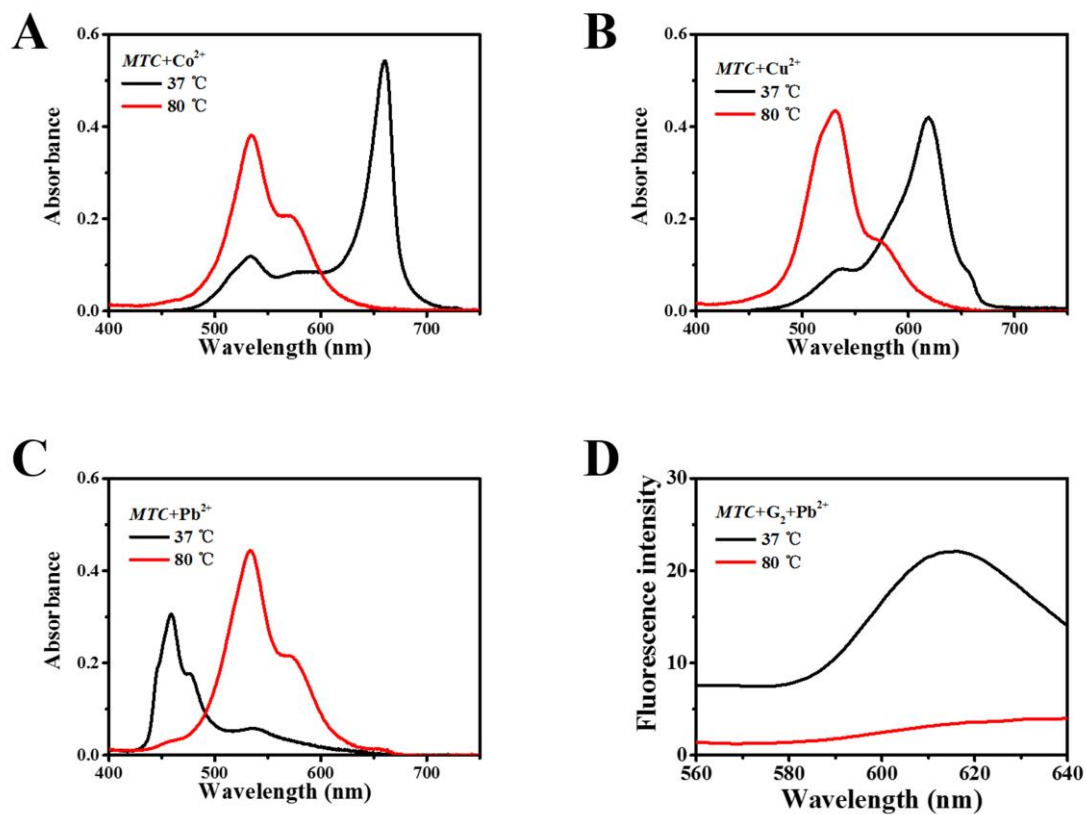

**Fig. S23** The temperature effect on the *MTC* J<sub>a</sub>-aggregates (A), J<sub>b</sub>-aggregates (B), H-aggregates (C) and the *MTC*-DNA complex (D). The concentration of *MTC* is 6  $\mu$ M.

## 2. The 8-to-3 encoding function was shut down by a high temperature

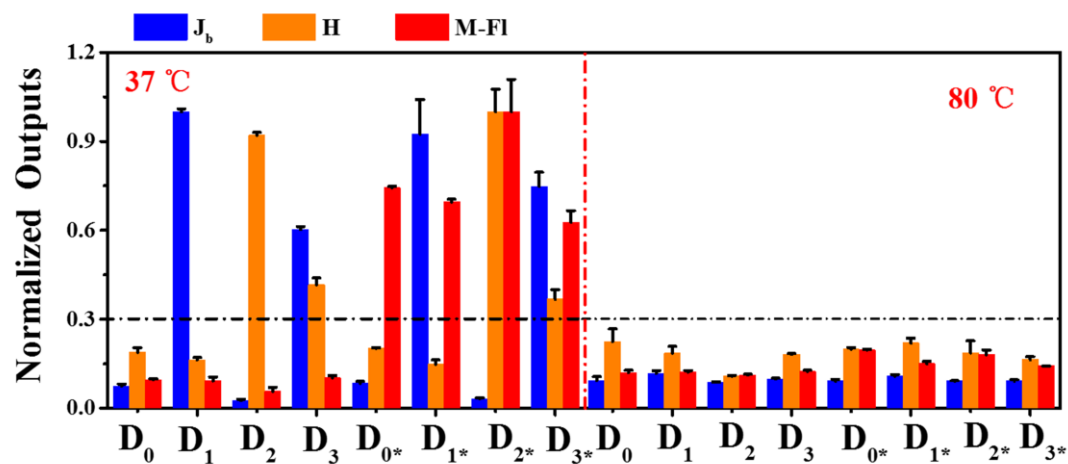

**Fig. S24** The normalized outputs of the 8-to-3 EC in 37 °C and 80 °C respectively. The concentration of *MTC* is 6  $\mu$ M.

## References

1. F. M. Hamer, *The cyanine dyes and related compounds*, Interscience Publishers, New York,, 1964.
2. G. E. Ficken, *The Chemistry of Synthetic Dyes*, Academic Press, New York, 1971.
3. H. A. Assi, R. El-Khoury, C. Gonzalez and M. J. Damha, *Nucleic Acids Res.*, 2017, 45, 11535-11546.
4. T. Li, E. K. Wang and S. J. Dong, *J. Am. Chem. Soc.*, 2009, 131, 15082–15083.
5. X. H. Zhou, D. M. Kong and H. X. Shen, *Anal. Chem.*, 2010, 82, 789-793.
6. Q. Yang, J. Xiang, S. Yang, Q. Li, Q. Zhou, A. Guan, X. Zhang, H. Zhang, Y. Tang and G. Xu, *Nucleic Acids Res.*, 2010, 38, 1022-1033.
7. S. Xu, Q. Li, J. Xiang, Q. Yang, H. Sun, A. Guan, L. Wang, Y. Liu, L. Yu, Y. Shi, H. Chen and Y. Tang, *Nucleic Acids Res.*, 2015, 43, 9575-9586.
